# Supplementary material for: Green synthesis of ZnO coated hybrid biochar for the synchronous removal of ciprofloxacin and tetracycline in wastewater
Source: Royal Society of Chemistry journal article supplement (doi:10.1039/d1ra01130h), 2021-01-01
Supplement: d1ra01130h1.pdf [file d1ra01130h1.pdf]

## Electronic Supplementary Information

### Green synthesis of ZnO coated Hybrid Biochar for the synchronous removal of Ciprofloxacin and Tetracycline in Water

Abisola O. Egbedina<sup>1</sup>, Kayode O. Adebowale<sup>1</sup>, Bamidele I. Olu-Owolabi<sup>1</sup>, Emmanuel I. Unuabonah<sup>2</sup>, Morenike O. Adesina<sup>1,2</sup>

<sup>1</sup>Department of Chemistry, Faculty of Science, Oduduwa Road, University of Ibadan, Nigeria.

<sup>2</sup>Department of Chemical Sciences, Environmental and Chemical Processes Research Laboratory, Redeemer's University, Ede, Nigeria.

## 1. Materials preparation

### 1.1. Purification of clay

The clay was suspended in distilled water for several hours. After this, the mixture was stirred in hydrogen peroxide solution until effervescence ceased in order to remove organics present in the clay. The mixture was left to stand for 12 hours after which it was filtered. The clay was washed with distilled water to remove any hydrogen peroxide remaining and oven dried at 343K.

## 2. Van't Hoff Equation

$$\ln K_d = \left( \frac{\Delta S^0}{R} \right) - \left( \frac{\Delta H^0}{RT} \right) \quad (1)$$

$$\Delta G^0 = -RT \ln K_d \quad (2)$$

$K_d$  is the equilibrium distribution coefficient, which is the ratio of the amount adsorbed on the adsorbents (mg/g) to the equilibrium concentration in solution (mg/L);  $T$  is the solution temperature (K) and  $R$  is the gas constant ( $8.314 \text{ J.K}^{-1}.\text{mol}^{-1}$ ).

Table S1: Adsorption isotherm model parameters for the adsorption of CIP and TET onto KCB, KCB-A and KCB-B

| Model                | Equation                                                   | Parameter                                                                         | CIP                  |                      |                      | TET    |        |                      |
|----------------------|------------------------------------------------------------|-----------------------------------------------------------------------------------|----------------------|----------------------|----------------------|--------|--------|----------------------|
|                      |                                                            |                                                                                   | KCB                  | KCB-A                | KCB-B                | KCB    | KCB-A  | KCB-B                |
| Freundlich           | $qe = K_F \cdot Ce^{1/n}$                                  | $K_F(\text{mg} \cdot \text{g}^{-1} \cdot (\text{L} \cdot \text{mg}^{-1})^{1/nF})$ | 12.63                | 10.22                | 8.05                 | 7.02   | 4.78   | 3.73                 |
|                      |                                                            | $nF$                                                                              | 2.03                 | 1.48                 | 1.35                 | 1.73   | 1.63   | 1.22                 |
|                      |                                                            | $R^2$                                                                             | 0.948                | 0.996                | 0.984                | 0.911  | 0.946  | 0.927                |
|                      |                                                            |                                                                                   |                      |                      |                      |        |        |                      |
| Langmuir             | $qe = \frac{q_{max} \cdot K_L \cdot Ce}{1 + K_L \cdot Ce}$ | $q_{max} (\text{mg/g})$                                                           | 71.10                | 139.92               | 228.73               | 118.01 | 116.55 | 231.93               |
|                      |                                                            | $K_L (\text{L} \cdot \text{mg}^{-1})$                                             | 0.22                 | 0.06                 | 0.02                 | 0.035  | 0.021  | 0.013                |
|                      |                                                            | $R_L$                                                                             | 0.05                 | 0.17                 | 0.34                 | 0.26   | 0.37   | 0.40                 |
|                      |                                                            | $R^2$                                                                             | 0.977                | 0.999                | 0.985                | 0.949  | 0.965  | 0.938                |
| Dubinin-Radushkevich | $qe = q_m \cdot \text{EXP}(-\beta \cdot Ce^2)$             | $q_m (\text{mol} \cdot \text{g}^{-1})$                                            | 20.70                | 72.20                | 73.37                | 81.35  | 66.64  | 80.41                |
|                      |                                                            | $\beta (\text{mol}^2 \cdot \text{KJ}^{-2})$                                       | $9.7 \times 10^{-3}$ | $1.0 \times 10^{-4}$ | $2.9 \times 10^{-3}$ | 0.04   | 0.02   | 0.03                 |
|                      |                                                            | $E$                                                                               | 7.15                 | 69.11                | 13.06                | 3.52   | 4.93   | 4.17                 |
|                      |                                                            | $R^2$                                                                             | 0.674                | 0.960                | 0.9722               | 0.974  | 0.929  | 0.971                |
| Temkin               | $qe = \frac{RT}{b_T} \ln \ln (K_T \cdot Ce)$               | $b_T (\text{J} \cdot \text{mol}^{-1})$                                            | 166.72               | 118.78               | 145.01               | 96.78  | 145.01 | 92.84                |
|                      |                                                            | $K_T (\text{L} \cdot \text{mg}^{-1})$                                             | 2.34                 | 1.74                 | 2.61                 | 0.36   | 0.31   | 0.34                 |
|                      |                                                            | $B$                                                                               | 15.11                | 21.21                | 17.37                | 26.03  | 22.05  | 27.13                |
|                      |                                                            | $R^2$                                                                             | 0.989                | 0.988                | 0.948                | 0.970  | 0.962  | 0.878                |
| Brouers-Sotolongo    | $qe = q_{BS} (1 - \exp(-K_{BS} \cdot Ce^{\alpha_{BS}}))$   | $q_{BS} (\text{mg/g})$                                                            | 59.11                | 101.59               | 81.77                | 84.28  | 80.07  | 89.36                |
|                      |                                                            | $K_{BS} (\text{L/mg})$                                                            | 0.207                | 0.08                 | 0.0004               | 0.003  | 0.02   | $9.8 \times 10^{-4}$ |
|                      |                                                            | $\alpha_{BS}$                                                                     | 1.34                 | 0.95                 | 3.02                 | 2.14   | 1.15   | 4                    |
|                      |                                                            | $R^2$                                                                             | 0.989                | 0.999                | 0.991                | 0.997  | 0.969  | 2.50                 |
| Langmuir-Freundlich  | $qe = \frac{Q^0 (KCe)^n}{1 + (KCe)^n}$                     | $Q^0$                                                                             | 60.61                | 137.65               | 84.70                | 85.39  | 89.17  | 90.25                |
|                      |                                                            | $K$                                                                               | 0.40                 | 0.06                 | 0.09                 | 0.08   | 0.04   | 0.08                 |

|                |       |       |       |       |       |       |
|----------------|-------|-------|-------|-------|-------|-------|
| nL-F           | 1.59  | 1.01  | 04.64 | 2.62  | 1.38  | 3.23  |
| R <sup>2</sup> | 0.990 | 0.999 | 0.984 | 0.995 | 0.941 | 0.992 |

$q_e$  is the amount of solute adsorbed per unit weight of adsorbent (mg/g),  $C_e$  is the equilibrium concentration of solute in the bulk solution (mg/L),  $Q_{max}$  is the maximum monolayer adsorption capacity (mg/g),  $K_L$  is the constant related to the affinity of the adsorbate to the sorbent,  $A_T$  is the temkin equilibrium binding constant (L/mg) corresponding to maximum binding energy and B is the isotherm constant related to the heat of adsorption (J/mol), b is a constant, R is gas constant (8.314 J/mol/K) and T is temperature (K),  $q_{BS}$  is the saturation capacity in mg/g;  $K_{BS}$  is  $K_F/q_{BS}$  where  $K_F$  is the Freundlich constant;  $\alpha_{BS}$  is a measure of the width of the sorption energy distribution,  $K_F$  is an empirical constant indicative of the relative adsorption capacity of the adsorbent and  $1/n$  is an adsorption constant that shows the intensity of heterogeneity of adsorption.

Table S2: Kinetics model parameters for the adsorption of CIP and TET onto KCB, KCB-A and KCB-B

| Model                              | Equation                                                   | Parameter                           | CIP                   |                      |                     | TET                 |                       |                   |
|------------------------------------|------------------------------------------------------------|-------------------------------------|-----------------------|----------------------|---------------------|---------------------|-----------------------|-------------------|
|                                    |                                                            |                                     | KCB                   | KCB-A                | KCB-B               | KCB                 | KCB-A                 | KCB-B             |
| Pseudo first-order                 | $qt = qe - \exp\left(-\frac{qt}{qe}\right) \ln qe - k_1 t$ | qe (mg/g)                           | 7.55                  | 7.29                 | 7.66                | 7.32                | 7.33                  | 7.18              |
|                                    |                                                            | k <sub>1</sub> (min <sup>-1</sup> ) | 0.31                  | 1.20                 | 0.60                | 1.46                | 0.59                  | 1.67              |
|                                    |                                                            | RMSE                                | 1.49                  | 0.78                 | 0.25                | 0.14                | 0.20                  | 0.28              |
| Pseudo second-order                | $qt = \frac{qe^2 K_2 t}{qe K_2 t + 1}$                     | qe (mg/g)                           | 8.07                  | 7.62                 | 8.03                | 7.40                | 7.72                  | 7.27              |
|                                    |                                                            | k <sub>2</sub> (g/mg.min)           | 0.07                  | 0.28                 | 0.15                | 0.98                | 0.14                  | 1.00              |
|                                    |                                                            | h <sub>o</sub> (mg/g.min)           | 4.31                  | 8.95                 | 7.41                | 113.74              | 19.21                 | 108.03            |
|                                    |                                                            | RMSE                                | 1.33                  | 0.64                 | 0.32                | 0.12                | 0.23                  | 0.24              |
| Elovich                            | $qt = \beta \ln(\alpha \beta t)$                           | α (mg/g.min)                        | 59.18                 | 3.88x10 <sup>5</sup> | 1.4x10 <sup>4</sup> | 2.7x10 <sup>8</sup> | 5.47 x10 <sup>3</sup> | 8x10 <sup>7</sup> |
|                                    |                                                            | β (g/mg)                            | 1.02                  | 0.49                 | 0.63                | 0.35                | 0.65                  | 0.36              |
|                                    |                                                            | RMSE                                | 1.38                  | 0.55                 | 0.59                | 0.29                | 0.46                  | 0.32              |
| Intraparticle diffusion            | $qt = K_{IPD} \cdot t^{1/2} + C$                           | k <sub>IPD</sub>                    | 4.72                  | 6.17                 | 6.19                | 6.99                | 5.76                  | 6.76              |
|                                    |                                                            | C                                   | 0.51                  | 0.25                 | 0.28                | 0.066               | 0.30                  | 0.09              |
|                                    |                                                            | RMSE                                | 1.37                  | 0.56                 | 0.71                | 0.15                | 0.62                  | 0.20              |
| Brouers-Sotolongo fractal kinetics | $q_{n,a}(t) = qe[1 - [1 + [n$                              | qe (mg/g)                           | 9.29                  | 19.60                | 7.71                | 7.48                | 7.44                  | 15.50             |
|                                    |                                                            | n                                   | 1.01                  | 1.23                 | 1.00                | 3.06                | 281.49                | 1.40              |
|                                    |                                                            | τ                                   | 1.18x10 <sup>-4</sup> | 1.67                 | 0.016               | 0.22                | 34.02                 | 1.72              |
|                                    |                                                            | α                                   | 0.45                  | 0.099                | 1.31                | 0.51                | 1.71                  | 0.04              |
|                                    |                                                            | RMSE                                | 1.63                  | 0.71                 | 0.31                | 0.15                | 0.21                  | 0.27              |

qe and qt are the amounts adsorbed at equilibrium and time, t (mg/g), k<sub>1</sub> is the first order rate constant (g/mg.min) and t is the time in minutes, k<sub>2</sub> is the second order rate constant (g/mg.min), k<sub>IPD</sub> is the intraparticle diffusion constant and C indicates the boundary layer thickness between the adsorbate and adsorbent, τ is the time needed to adsorb half of the equilibrium quantity in

minutes;  $a$  is the time variation of rate constant;  $n$  is the fractional order of adsorption,  $q_e$  is the amount of adsorbate taken up at equilibrium in mg/g and  $q_t$  is the amount of adsorbate taken up at time,  $t$  in mg/g.

Table S3: Thermodynamics parameters for the adsorption of CIP and TET onto KCB-A, KCB-B and KCB composite adsorbents

| Parameter            | CIP     |        |         | TET     |          |         |
|----------------------|---------|--------|---------|---------|----------|---------|
|                      | KCB     | KCB-A  | KCB-B   | KCB     | KCB-A    | KCB-B   |
| $\Delta H$ (KJ/mol)  | 142.835 | 70.721 | -19.078 | -58.663 | -139.983 | -57.226 |
| $\Delta S$ (J/mol.K) | 0.509   | 0.249  | -0.018  | -0.436  | -0.166   | -0.174  |
| $\Delta G$ (KJ/mol)  |         |        |         |         |          |         |
| 298 K                | -3.371  | -3.033 | -4.319  | -1.855  | -3.427   | -1.608  |
| 308 K                | -4.089  | -3.925 | -3.912  | -4.634  | -2.124   | -1.514  |
| 318 K                | -5.342  | -4.354 | -4.385  | 1.723   | 2.088    | 2.126   |
